# Supplementary material for: Equilibrium, kinetic and thermodynamic adsorption studies of organic pollutants from aqueous solution onto CNT/C@Fe/chitosan composites
Source: Royal Society of Chemistry journal article supplement (doi:10.1039/c5nj01876e), 2015-01-01
Supplement: c5nj01876e1.pdf [file c5nj01876e1.pdf]

**Equilibrium, Kinetic and Thermodynamic Adsorption Studies of  
Organic Pollutants from aqueous solution onto  
CNTs/C@Fe/Chitosan Composites**

Jie Ma<sup>a</sup>, Yuan Zhuang<sup>a</sup>, Fei Yu<sup>a,b\*</sup>

<sup>a</sup> State Key Laboratory of Pollution Control and Resource Reuse, School of Environmental Science and Engineering, Tongji University, 1239 Siping Road, Shanghai 200092, P. R. of China. Tel: 86-21-6598 1831; E-mail:

[jma@tongji.edu.cn](mailto:jma@tongji.edu.cn).

<sup>b</sup> College of chemistry and environmental engineering, Shanghai Institute of Technology, Shanghai 2001418, China; E-mail: [fyu@vip.163.com](mailto:fyu@vip.163.com)

**Table S1 Maximum adsorption capacities of MB, MO, TC, and ROX on other adsorbents**

| Pollutants | Adsorbent                                                                           | Maximum adsorption capacities(mg/g) | Ref.       |
|------------|-------------------------------------------------------------------------------------|-------------------------------------|------------|
| MB         | Calcinated monolithic rectorite/starch composites                                   | 180.8                               | 1          |
| MB         | Ethylenediamine-grafted-polyacrylonitrile Nanofibers membrane                       | 94.1                                | 2          |
| MB         | CNTs/C@Fe/CS                                                                        | 111.1                               | This study |
| MO         | Activated carbon                                                                    | 434.0                               | 3          |
| MO         | Chitosan/Al <sub>2</sub> O <sub>3</sub> /magnetic iron oxide nanoparticle composite | 417                                 | 4          |
| MO         | CNTs/C@Fe/CS                                                                        | 500.0                               | This study |
| TC         | Fe-impregnated SBA-15                                                               | 41.7                                | 5          |
| TC         | Graphene oxide                                                                      | 313.0                               | 6          |
| TC         | CNTs/C@Fe/CS                                                                        | 125.0                               | This study |
| ROX        | Multi-walled carbon nanotubes                                                       | 12.8                                | 7          |
| ROX        | CNTs/C@Fe/CS                                                                        | 142.9                               | This study |

## References

1. F. Wang, P. R. Chang, P. W. Zheng and X. F. Ma, *Appl Surf Sci*, 2015, **349**, 251-258.
2. S. Haider, F. F. Binagag, A. Haider, A. Mahmood, N. Shah, W. A. Al-Masry, S. U. D. Khan and S. M. Ramay, *Desalin Water Treat*, 2015, **55**, 1609-1619.
3. K. Mahmoudi, K. Hosni, N. Hamdi and E. Srasra, *Korean J Chem Eng*, 2015, **32**, 274-283.
4. B. Tanhaei, A. Ayati, M. Lahtinen and M. Sillanpaa, *Chemical Engineering Journal*, 2015, **259**, 1-10.
5. B. K. Vu, E. W. Shin, O. Snisarenko, W. S. Jeong and H. S. Lee, *Korean J Chem Eng*, 2010, **27**, 116-120.
6. Y. Gao, Y. Li, L. Zhang, H. Huang, J. J. Hu, S. M. Shah and X. G. Su, *J Colloid Interf Sci*, 2012, **368**, 540-546.
7. J. L. Hu, Z. L. Tong, Z. H. Hu, G. W. Chen and T. H. Chen, *J Colloid Interf Sci*, 2012, **377**, 355-361.
